# Supplementary material for: Hydrometeorological drivers of the 2017 flood in the Brahmaputra basin in Bangladesh
Source: Copernicus journal article supplement (doi:10.5194/hess-2019-286), 2019-06-24
Supplement: Supplementary file 1 [file hess-2019-286-supplement.pdf]

Supplement of

“Hydrometeorological drivers of the 2017 flood in the Brahmaputra basin in Bangladesh”

Hossain et al.

Correspondence to: Sazzad Hossain (mdsazzad.hossain@pgr.reading.ac.uk)

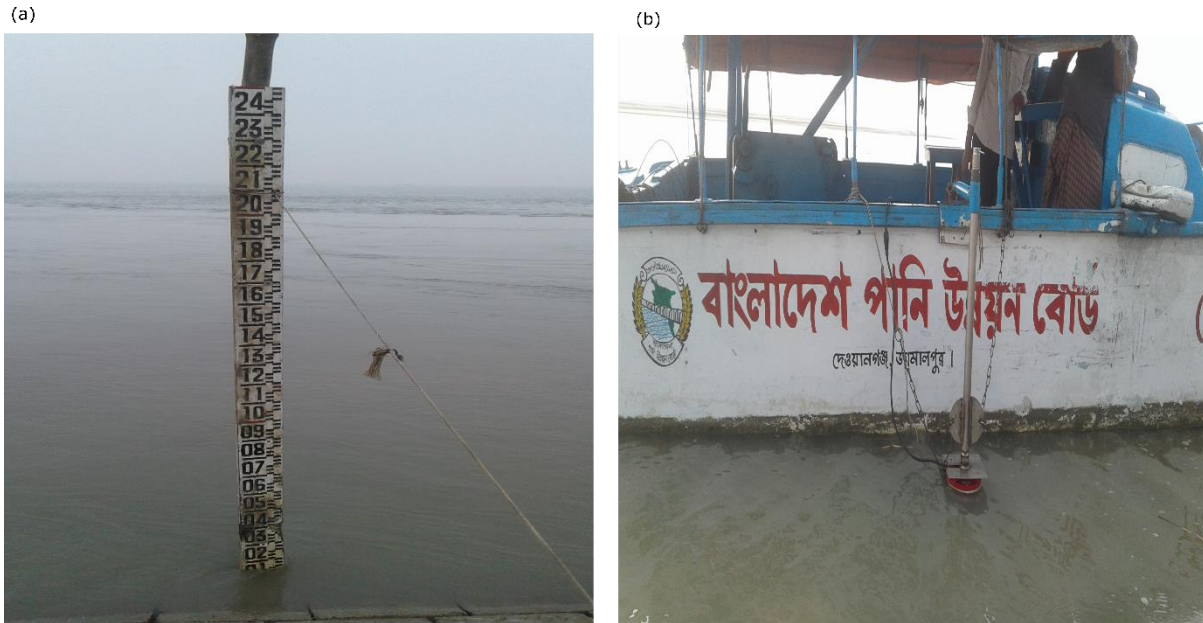

Figure S1: (a) Water level staff gauge at Bahadurabad gauging station; (b) Discharge measurement using the ADCP Bahadurabad gauging station, Brahmaputra river in Bangladesh (Photo credit: Hydrology division, BWDB)

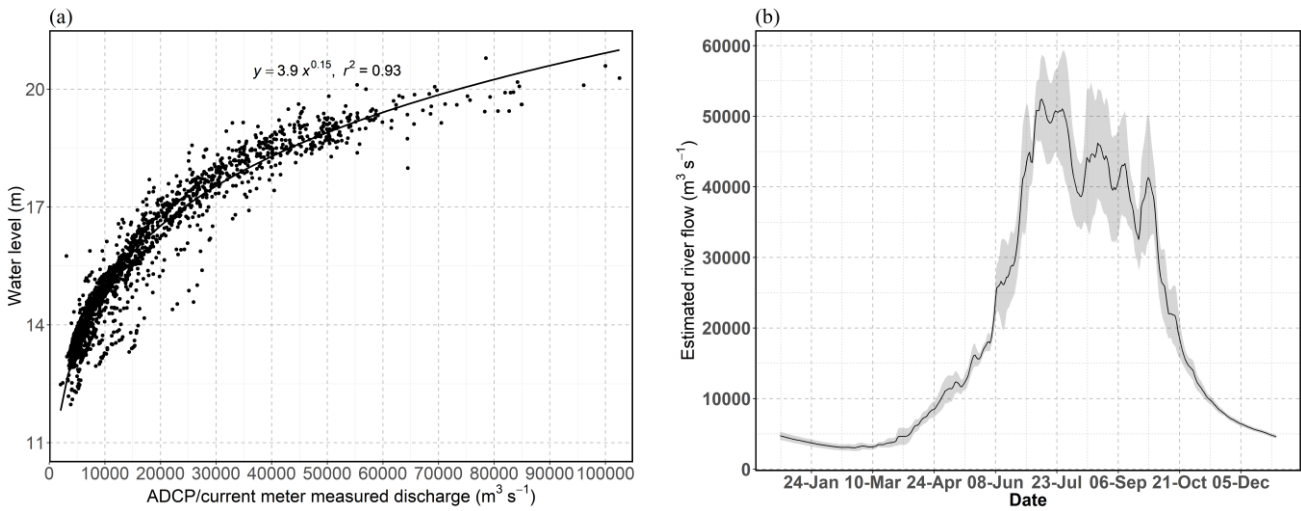

Figure S2: (a) Relationship between water level (m) and measured discharge (m³/s) by ADCP/current meter Bahadurabad gauging station, Brahmaputra river in Bangladesh over the period 1987-2017 (b) Rating river discharge (m³/s) (black line) with associated uncertainty (grey shading shows the variability within one standard deviation)

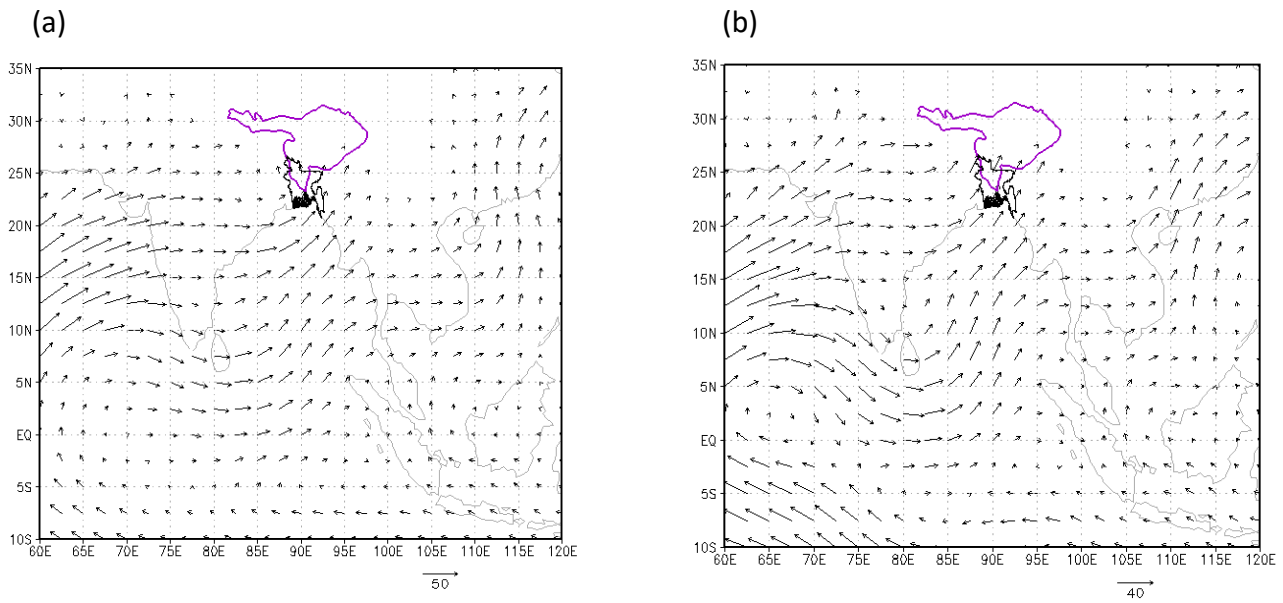

Figure S3: Mean vertically integrated moisture flux ( $\text{kgm}^{-1}\text{s}^{-1}$ ) at 850 hPa (a) during 1-7 July (b) during 8-13 August 2017 based on the NCEP/NCAR reanalysis data.

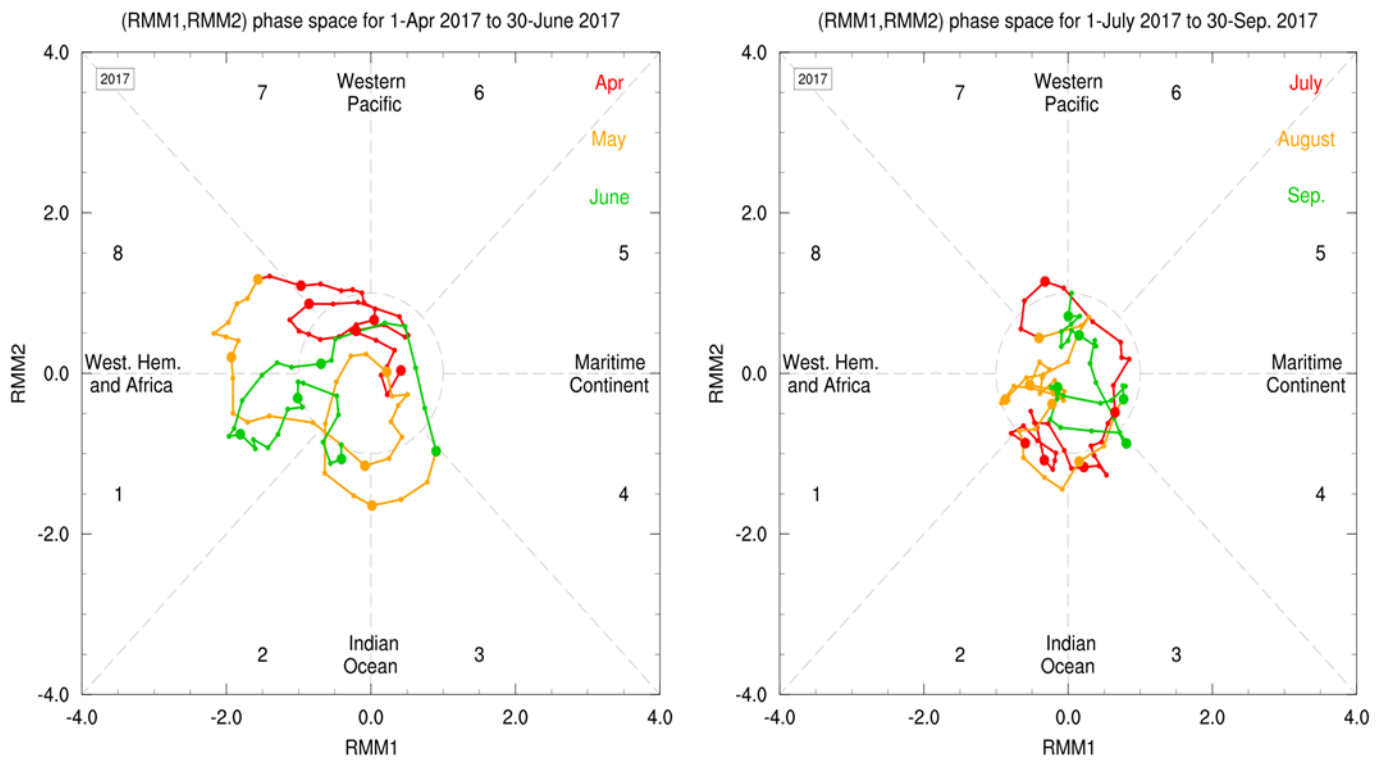

Figure S4: MJO phase diagram July to September 2017 (Source: BOM, 2017)

Table S1: Activity of the monsoon during 8 August to 13 August 2017  
(retrieved during monsoon period and presently not available) (Source: IMD,2017b)

| Region                                 | 8 Aug. | 9Aug.    | 10 Aug   | 11 Aug.  | 12 Aug.  | 13 Aug. |
|----------------------------------------|--------|----------|----------|----------|----------|---------|
| Sub-Himalaya-West<br>Bengal and Sikkim | Active | Active   | Active   | Active   | Vigorous | Normal  |
| Assam and Meghalaya                    | Normal | Normal   | Active   | Active   | Active   | Active  |
| Arunachal Pradesh                      | Active | Vigorous | Vigorous | Vigorous | Active   | Active  |

Table S2: Peak water level (m) with date (Data from BWDB internal database)

| Year | Brahmaputra<br>(Bahadurabad) |           | Dharla<br>(Kurigram)  |           | Dudkumar<br>(Pateswari) |           | Teesta (Dalia)        |           |
|------|------------------------------|-----------|-----------------------|-----------|-------------------------|-----------|-----------------------|-----------|
|      | Water<br>level<br>(m)        | Peak date | Water<br>level<br>(m) | Peak date | Water<br>level<br>(m)   | Peak date | Water<br>level<br>(m) | Peak date |
| 1987 | 19.68                        | 15 Aug.   | 27.45                 | 12 Aug.   | 27.45                   | 12 Aug    | 52.51                 | 14 Aug.   |
| 1988 | 20.62                        | 31 Aug.   | 27.35                 | 03 Aug    | 27.35                   | 30 Aug    | 52.60                 | 24 Aug.   |
| 1989 | 19.56                        | 06 July   | 26.23                 | 20 Sep    | 26.23                   | 20 Sep    | 52.66                 | 16 June   |
| 1990 | 19.38                        | 25 July   | 25.87                 | 14 Aug    | 25.87                   | 27 Aug    | 52.48                 | 13 Aug.   |
| 1991 | 20.08                        | 14 July   | 26.74                 | 13 July   | 26.74                   | 04 Aug    | 52.28                 | 14 June   |
| 1992 | 19.18                        | 01 July   | 25.93                 | 20 July   | 25.93                   | 17 July   | 51.91                 | 26 Aug.   |
| 1993 | 19.89                        | 23 July   | 27.31                 | 22 July   | 27.31                   | 22 July   | 51.83                 | 20 July   |
| 1994 | 18.74                        | 01 July   | 25.31                 | 16 Aug    | 25.31                   | 15 Aug    | 51.83                 | 26 July   |
| 1995 | 20.36                        | 10 July   | 27.41                 | 10 July   | 27.41                   | 17 June   | 52.05                 | 15 June   |
| 1996 | 19.99                        | 16 July   | 27.66                 | 15 July   | 27.66                   | 15 July   | 52.04                 | 18 July   |
| 1997 | 19.93                        | 14 July   | 26.70                 | 13 July   | 26.70                   | 18 June   | 51.98                 | 30 June   |
| 1998 | 20.37                        | 08 Sep.   | 27.22                 | 05 Sep    | 27.22                   | 25 July   | 52.00                 | 24 July   |
| 1999 | 19.82                        | 24 Aug.   | 27.49                 | 26 Aug.   | 27.49                   | 26 Aug.   | 52.06                 | 15 Aug.   |
| 2000 | 20.16                        | 07 Aug.   | 27.32                 | 06 Aug    | 27.32                   | 06 Aug    | 52.28                 | 16 Aug.   |
| 2001 | 19.32                        | 04 Aug.   | 26.41                 | 07 Oct    | 26.41                   | 07 Sep    | 52.20                 | 06 Oct    |
| 2002 | 20.09                        | 28 July   | 27.22                 | 26 July   | 27.22                   | 26 July   | 52.22                 | 28 July   |
| 2003 | 19.89                        | 14 July   | 27.45                 | 10 July   | 27.45                   | 10 July   | 52.60                 | 09 July   |
| 2004 | 20.18                        | 15 July   | 27.41                 | 14 July   | 27.41                   | 13 July   | 52.30                 | 08 July   |
| 2005 | 19.48                        | 31 Aug.   | 27.01                 | 20 July   | 27.01                   | 20 July   | 52.41                 | 21 July   |
| 2006 | 18.85                        | 18 June   | 26.31                 | 08 July   | 26.31                   | 08 July   | 52.33                 | 24 Sep.   |
| 2007 | 20.37                        | 30 July   | 27.40                 | 09 Sep    | 27.40                   | 30 July   | 52.95                 | 08 Sep.   |
| 2008 | 19.75                        | 08 Sep.   | 26.89                 | 01 Sep    | 26.89                   | 31 Aug.   | 52.62                 | 22 June   |
| 2009 | 19.37                        | 22 Aug    | 26.68                 | 21 Aug    | 26.68                   | 30 June   | 52.48                 | 08 Oct.   |
| 2010 | 19.78                        | 14 Sep.   | 26.79                 | 23 July   | 26.79                   | 22 July   | 52.65                 | 18 June   |
| 2011 | 19.64                        | 23 July   | 25.98                 | 01 Aug    | 25.98                   | 20 July   | 52.50                 | 19 Sep    |
| 2012 | 20.54                        | 01 July   | 26.70                 | 30 June   | 26.70                   | 28 June   | 52.70                 | 17 July   |
| 2013 | 19.91                        | 11 Sep    | 26.68                 | 11 July   | 26.68                   | 11 July   | 52.66                 | 10 July   |
| 2014 | 20.20                        | 29 Aug    | 26.94                 | 28 Aug    | 26.94                   | 27 Aug.   | 52.66                 | 26 Aug.   |
| 2015 | 20.17                        | 06 Sep.   | 26.98                 | 03 Sep    | 26.98                   | 03 Sep    | 52.71                 | 01 Sep.   |
| 2016 | 20.71                        | 28 July   | 27.56                 | 28 July   | 27.56                   | 27 July   | 52.59                 | 23 June   |
| 2017 | 20.84                        | 16 Aug.   | 27.84                 | 13 Aug    | 27.84                   | 13 Aug    | 53.05                 | 13 Aug.   |

Table S3: Measured river flow (m<sup>3</sup>/s) at Bahadurabad gauging station in different high water levels  
(Data from BWDB internal database)

| Water Level (m) | Peak river discharge<br>(m <sup>3</sup> /s) | Date of measurement |
|-----------------|---------------------------------------------|---------------------|
| 20.28           | 102535                                      | 9 September 1998    |
| 20.07           | 84520                                       | 17 August 1998      |
| 20.10           | 96105                                       | 12 September 2004   |
| 20.79           | 78525                                       | 17 August 2017      |
| 20.18           | 84200                                       | 11 July 1995        |
| 19.80           | 79270                                       | 25 July 1997        |
| 19.92           | 83485                                       | 16 July 1996        |
| 19.72           | 75660                                       | 10 September 2013   |
| 19.14           | 70500                                       | 10 July 1989        |
